# Supplementary material for: Physiological traits underlying sodicity tolerance in Jamun (Syzygium cumini L. Skeels) cultivars
Source: PeerJ. 2025 Mar 25;13:e19132. doi: 10.7717/peerj.19132 (PMC11952042; doi:10.7717/peerj.19132)
Supplement: Supplemental Information 1 [file peerj-13-19132-s001.xlsx]

## Sheet: ST1
Supplementary Table 1: Saturated soil paste pH (pHs) and soil saturation extract electrical conductivity (ECe) at different depths.
Treatment	Depth (cm)	pHs	ECe (dS/m)	ESP (%)	CEC (me/100 g)	OC (%)	Na_CEC (me/l)	Na_ESP (me/l)
Control	0-30	7.81±0.17e	0.58±0.06d	8.35±0.68d	13.89±1.22a	0.44±0.05a	0.69±0.06a	0.58±0.10c
	30-60	8.14±0.12d	0.73±0.05c	10.82±1.57d	14.12±1.17a	0.41±0.03a	0.71±0.06a	0.76±0.13c
	60-100	8.35±0.15cd	0.92±0.11b	16.58±1.34c	12.09±0.92b	0.34±0.04b	0.61±0.04b	1.01±0.16b
Sodic	0-30	8.45±0.09c	0.66±0.06cd	18.34±1.59c	12.17±1.06b	0.30±0.04b	0.61±0.05b	1.12±0.18b
	30-60	8.82±0.11b	0.95±0.12b	29.79±1.98b	9.62±0.96c	0.24±0.05c	0.48±0.05c	1.43±0.16a
	60-100	9.11±0.32a	1.14±0.14a	39.60±4.34a	7.91±0.94d	0.17±0.02d	0.40±0.04d	1.56±0.21a
ANOVA	Treatment (T)	***	***	***	***	***	***	***
	Depth (D)	***	***	***	***	***	***	***
	T x D	ns	*	***	***	ns	***	ns
Note: Each value represents mean ± SD of four replicates. The means in each column having one letter in common are not significantly different according to Tukey’s test (p 0.05).
Na_CEC and Na_ESP refer to Na concentrations per 5 g soil extracted in 100 ml solution.
*** Significant at p<0.001 *significant at p<0.05 ns: non-significant

## Sheet: ST2
Supplementary Table 2: Pearson's correlation between the measured soil properties
Variable	pHs	ECe	Na_CEC	Na_ESP	CEC	ESP	OC
pHs	—
ECe	-0.668	—
Na_CEC	-0.704	-0.656	—
Na_ESP	0.901	0.69	-0.541	—
CEC	-0.793	-0.74	0.946	-0.666	—
ESP	0.943	0.79	-0.772	0.918	-0.871	—
OC	-0.885	-0.739	0.729	-0.868	0.824	-0.914	—
Correlations were significant at p<0.001

## Sheet: ST3
Supplementary Table 2: Correlation coefficients (r) and the associatedp-values (p) between the measured traits.
Trait	Trait	r	p
TCSA	CV	0.820692	9.28813e-13
TCSA	LA	0.548746	5.38348e-05
CV	LA	0.245701	0.0923154
TCSA	SPAD	-0.31736	0.027953
CV	SPAD	-0.197452	0.178557
LA	SPAD	-0.0666498	0.652644
TCSA	Pn	0.624904	2.05843e-06
CV	Pn	0.41373	0.00346602
LA	Pn	0.459888	0.00100698
SPAD	Pn	0.245708	0.0923061
TCSA	E	0.356891	0.0127729
CV	E	0.291804	0.0441756
LA	E	0.0387453	0.793739
SPAD	E	0.444198	0.00156284
Pn	E	0.772928	1.21845e-10
TCSA	gs	0.280052	0.0538696
CV	gs	0.162075	0.271076
LA	gs	0.130973	0.374908
SPAD	gs	0.458121	0.00105921
Pn	gs	0.741839	1.61234e-09
E	gs	0.915802	0
TCSA	Ci	0.230132	0.115585
CV	Ci	0.317913	0.0276667
LA	Ci	0.11357	0.44214
SPAD	Ci	0.770524	1.50913e-10
Pn	Ci	0.626084	1.94342e-06
E	Ci	0.780883	5.89044e-11
gs	Ci	0.713131	1.28998e-08
TCSA	WUE	0.0107128	0.94239
CV	WUE	-0.0903775	0.541265
LA	WUE	0.433159	0.00210338
SPAD	WUE	-0.320434	0.0263899
Pn	WUE	-0.19652	0.180655
E	WUE	-0.751332	7.62705e-10
gs	WUE	-0.622583	2.30329e-06
Ci	WUE	-0.522795	0.000137836
TCSA	Anth	-0.609406	4.28639e-06
CV	Anth	-0.417827	0.00312709
LA	Anth	-0.544202	6.38266e-05
SPAD	Anth	-0.374042	0.00881998
Pn	Anth	-0.812555	2.34746e-12
E	Anth	-0.695526	4.09606e-08
gs	Anth	-0.627839	1.78339e-06
Ci	Anth	-0.720053	7.99844e-09
WUE	Anth	0.250465	0.0859761
TCSA	Flav	-0.310883	0.0315007
CV	Flav	-0.0388818	0.793029
LA	Flav	-0.484719	0.000480617
SPAD	Flav	-0.493906	0.000360299
Pn	Flav	-0.78489	4.03797e-11
E	Flav	-0.734201	2.87727e-09
gs	Flav	-0.747742	1.01619e-09
Ci	Flav	-0.674912	1.43403e-07
WUE	Flav	0.261587	0.072499
Anth	Flav	0.839225	9.32587e-14
TCSA	APX	-0.137942	0.349801
CV	APX	0.0275672	0.852451
LA	APX	-0.48146	0.00053132
SPAD	APX	-0.609412	4.28515e-06
Pn	APX	-0.74129	1.68192e-09
E	APX	-0.608622	4.44394e-06
gs	APX	-0.658029	3.72536e-07
Ci	APX	-0.656489	4.05223e-07
WUE	APX	0.109684	0.458013
Anth	APX	0.708903	1.71562e-08
Flav	APX	0.863797	2.66454e-15
TCSA	CAT	-0.161703	0.272193
CV	CAT	0.0754337	0.610352
LA	CAT	-0.54747	5.64843e-05
SPAD	CAT	-0.382499	0.00729545
Pn	CAT	-0.682656	9.06261e-08
E	CAT	-0.346588	0.0158105
gs	CAT	-0.391375	0.0059464
Ci	CAT	-0.415487	0.00331693
WUE	CAT	-0.141354	0.337891
Anth	CAT	0.590424	9.99928e-06
Flav	CAT	0.662355	2.93375e-07
APX	CAT	0.857285	7.54952e-15
TCSA	POX	-0.721007	7.47979e-09
CV	POX	-0.357584	0.0125879
LA	POX	-0.552103	4.73983e-05
SPAD	POX	0.198153	0.176989
Pn	POX	-0.742816	1.49496e-09
E	POX	-0.283998	0.0504394
gs	POX	-0.266452	0.0671572
Ci	POX	-0.103508	0.48386
WUE	POX	-0.235525	0.107067
Anth	POX	0.549253	5.28139e-05
Flav	POX	0.438757	0.00181149
APX	POX	0.408781	0.00391829
CAT	POX	0.562841	3.12463e-05
TCSA	SOD	-0.626097	1.94224e-06
CV	SOD	-0.733863	2.95059e-09
LA	SOD	-0.320321	0.0264461
SPAD	SOD	-0.184631	0.209015
Pn	SOD	-0.681049	9.97959e-08
E	SOD	-0.633193	1.36758e-06
gs	SOD	-0.532895	9.64733e-05
Ci	SOD	-0.674845	1.43965e-07
WUE	SOD	0.366975	0.010298
Anth	SOD	0.714609	1.16619e-08
Flav	SOD	0.452724	0.00123398
APX	SOD	0.444776	0.0015383
CAT	SOD	0.411191	0.00369195
POX	SOD	0.331978	0.021156
TCSA	Prol	-0.228921	0.117567
CV	Prol	0.17475	0.23485
LA	Prol	-0.3977	0.00512293
SPAD	Prol	-0.0502367	0.734542
Pn	Prol	-0.678977	1.12895e-07
E	Prol	-0.511311	0.000204044
gs	Prol	-0.545747	6.02529e-05
Ci	Prol	-0.217963	0.136686
WUE	Prol	0.166871	0.256958
Anth	Prol	0.558534	3.69945e-05
Flav	Prol	0.680165	1.05201e-07
APX	Prol	0.64463	7.62386e-07
CAT	Prol	0.753756	6.26658e-10
POX	Prol	0.591172	9.68058e-06
SOD	Prol	0.309672	0.0322035
TCSA	Na	-0.438915	0.00180382
CV	Na	-0.281978	0.0521726
LA	Na	-0.356365	0.0129148
SPAD	Na	-0.575625	1.8664e-05
Pn	Na	-0.79629	1.31828e-11
E	Na	-0.834879	1.64091e-13
gs	Na	-0.777062	8.38236e-11
Ci	Na	-0.878144	2.22045e-16
WUE	Na	0.44969	0.00134314
Anth	Na	0.904404	0
Flav	Na	0.888963	0
APX	Na	0.729506	4.0679e-09
CAT	Na	0.531617	0.000100991
POX	Na	0.400676	0.00477131
SOD	Na	0.646666	6.85335e-07
Prol	Na	0.521199	0.000145681
TCSA	K	-0.0401717	0.786321
CV	K	-0.0525721	0.722683
LA	K	0.581539	1.45978e-05
SPAD	K	0.43969	0.00176649
Pn	K	0.0802017	0.5879
E	K	-0.245815	0.092159
gs	K	-0.170124	0.247667
Ci	K	0.238551	0.102504
WUE	K	0.554733	4.28554e-05
Anth	K	-0.257137	0.0776753
Flav	K	-0.251441	0.0847198
APX	K	-0.465384	0.000858998
CAT	K	-0.524639	0.00012925
POX	K	-0.0884585	0.549922
SOD	K	-0.0646613	0.662376
Prol	K	0.0421708	0.775956
Na	K	-0.171386	0.244123
TCSA	Ca	0.638402	1.05115e-06
CV	Ca	0.444943	0.00153126
LA	Ca	0.610524	4.07078e-06
SPAD	Ca	-0.677631	1.22251e-07
Pn	Ca	0.109662	0.4581
E	Ca	-0.38296	0.00721927
gs	Ca	-0.369691	0.00970646
Ci	Ca	-0.460254	0.000996456
WUE	Ca	0.654234	4.57941e-07
Anth	Ca	-0.0639117	0.666059
Flav	Ca	0.135861	0.357185
APX	Ca	0.169453	0.249565
CAT	Ca	-0.0350787	0.81289
POX	Ca	-0.574147	1.98316e-05
SOD	Ca	-0.0436251	0.768439
Prol	Ca	0.00251116	0.986485
Na	Ca	0.229299	0.116945
K	Ca	0.199291	0.174464
TCSA	Mg	0.436804	0.00190895
CV	Mg	-0.000515734	0.997224
LA	Mg	0.131131	0.374325
SPAD	Mg	-0.396532	0.0052671
Pn	Mg	0.403235	0.00448591
E	Mg	0.289233	0.0461649
gs	Mg	0.263538	0.0703172
Ci	Mg	-0.133168	0.366887
WUE	Mg	-0.131747	0.372068
Anth	Mg	-0.271034	0.0624161
Flav	Mg	-0.273634	0.0598482
APX	Mg	0.0173921	0.9066
CAT	Mg	-0.0746713	0.613976
POX	Mg	-0.638421	1.05015e-06
SOD	Mg	0.0388591	0.793147
Prol	Mg	-0.586114	1.20304e-05
Na	Mg	-0.25385	0.081682
K	Mg	-0.495842	0.00033872
Ca	Mg	0.252503	0.0833705
TCSA	Cl	-0.746723	1.1015e-09
CV	Cl	-0.546504	5.85697e-05
LA	Cl	-0.486063	0.000461009
SPAD	Cl	-0.266275	0.0673454
Pn	Cl	-0.859903	4.88498e-15
E	Cl	-0.737377	2.26682e-09
gs	Cl	-0.677845	1.20719e-07
Ci	Cl	-0.691463	5.28615e-08
WUE	Cl	0.251096	0.0851624
Anth	Cl	0.88812	0
Flav	Cl	0.779651	6.60538e-11
APX	Cl	0.593229	8.85267e-06
CAT	Cl	0.423045	0.00273788
POX	Cl	0.665295	2.48865e-07
SOD	Cl	0.649083	6.03274e-07
Prol	Cl	0.440372	0.00173426
Na	Cl	0.886941	0
K	Cl	-0.0986994	0.504506
Ca	Cl	-0.163549	0.266684
Mg	Cl	-0.418054	0.00310916
TCSA	K.Na	0.277868	0.055847
CV	K.Na	0.18045	0.219693
LA	K.Na	0.48187	0.000524679
SPAD	K.Na	0.685137	7.80041e-08
Pn	K.Na	0.689984	5.79457e-08
E	K.Na	0.676617	1.2977e-07
gs	K.Na	0.655502	4.27574e-07
Ci	K.Na	0.862408	3.33067e-15
WUE	K.Na	-0.266945	0.0666331
Anth	K.Na	-0.86204	3.55271e-15
Flav	K.Na	-0.884069	0
APX	K.Na	-0.841194	7.19425e-14
CAT	K.Na	-0.645209	7.39694e-07
POX	K.Na	-0.249397	0.0873666
SOD	K.Na	-0.609586	4.25102e-06
Prol	K.Na	-0.456478	0.00110989
Na	K.Na	-0.916894	0
K	K.Na	0.477439	0.000600479
Ca	K.Na	-0.220471	0.132119
Mg	K.Na	-0.0513662	0.728799
Cl	K.Na	-0.741632	1.6382e-09

## Sheet: ST4
Supplementary Table 3: PCA loadings, Eigen value, variance and cumulative variance explained by the first four PCs.
Trait	PC1	PC2	PC3	PC4
TCSA	-0.542	0.693	-0.331	0.301
CV	-0.352	0.439	-0.376	0.713
LA	-0.492	0.592	0.466	0.04
SPAD	-0.466	-0.722	0.373	0.137
Pn	-0.92	0.205	-0.095	-0.097
E	-0.833	-0.312	-0.415	-0.042
gs	-0.802	-0.308	-0.29	-0.139
Ci	-0.804	-0.446	-0.002	0.329
WUE	0.339	0.606	0.648	-0.006
Anth	0.931	-0.114	-0.021	-0.102
Flav	0.905	0.1	-0.148	0.216
APX	0.831	0.16	-0.416	0.175
CAT	0.688	-0.093	-0.519	0.3
POX	0.569	-0.69	0.034	0.257
SOD	0.726	-0.085	0.201	-0.458
Prol	0.648	-0.14	-0.016	0.672
Na	0.949	0.17	0.053	-0.05
K	-0.209	0.08	0.915	0.275
Ca	0.063	0.965	0.104	0.127
Mg	-0.27	0.429	-0.501	-0.615
Cl	0.901	-0.221	0.178	-0.129
K/Na	-0.892	-0.228	0.287	0.141
Eigen value	10.572	4.158	3.014	2.172
Variance (%)	48.1	18.9	13.7	9.9
Cumulative (%)	48.1	67	80.7	90.5
KMO test value	0.754
Bartlett’s test value	χ² = 2293.54 (p<0 .001)

## Sheet: ST5
Supplementary Table 4: Sodicity tolerance Coefficients (STC) and membership function values (MFV) for different traits measured in the present study.
Cultivar	TCSA_C	TCSA_S	STC	MFV	CV_C	CV_S	STC	MFV	LA_C	LA_S	STC	MFV	SPAD_C	SPAD_S	STC	MFV	Pn_C	Pn_S	STC	MFV	E_C	E_S	STC	MFV	gs_C	gs_S	STC	MFV	Ci_C	Ci_S	STC	MFV	WUE_C	WUE_S	STC	MFV	Anth_C	Anth_S	STC	MFV	Flav_C	Flav_S	STC	MFV	APX_C	APX_S	STC	MFV	CAT_C
J-37	11.37	9.32	81.9701	1	0.89	0.75	84.2697	1	89.76	84.18	93.7834	0.344436	47.42	45.05	95.0021	1	8.65	7.03	81.2717	0.941177	2.85	2.04	71.5789	0.554535	0.13	0.09	69.2308	0.602007	283.29	238.54	84.2035	1	3.04	3.45	113.487	0.615704	0.19	0.34	178.947	0.962171	0.63	0.83	131.746	0.0603494	2.93	4.31	147.099	0.394613	1.72
J-42	14.03	9.64	68.7099	0.0900586	0.77	0.57	74.026	0.157195	84.28	82.2	97.532	1	40.42	33.97	84.0426	0.0828228	9.16	7.55	82.4236	1	3.28	2.58	78.6585	1	0.15	0.12	80	1	253.65	203.01	80.0355	0	2.8	2.93	104.643	0.211957	0.23	0.35	152.174	0	0.65	0.84	129.231	0	4.24	4.6	108.491	0	2.87
GP	18.31	14.34	78.3179	0.749376	2.37	1.83	77.2152	0.419589	86.75	82.1	94.6398	0.494196	41.6	34.55	83.0529	0	10.63	6.68	62.841	0	3.76	2.36	62.766	0	0.17	0.09	52.9412	0	290.69	234.83	80.7837	0.179504	2.83	2.83	100	0	0.18	0.31	172.222	0.720486	0.67	0.94	140.299	0.265551	3.16	6.52	206.329	1	2.27
KB	10.49	7.07	67.3975	0	1.04	0.75	72.1154	0	80.38	73.8	91.8139	0	51.2	46.37	90.5664	0.628787	9.02	7.04	78.0488	0.776597	4.3	2.77	64.4186	0.103989	0.21	0.12	57.1429	0.15528	313.62	263.03	83.869	0.919757	2.1	2.56	121.905	1	0.2	0.36	180	1	0.55	0.94	170.909	1	3.08	5.18	168.182	0.6101	3.25
		Min	67.3975				72.1154				91.8139				83.0529				62.841				62.766				52.9412				80.0355				100				152.174				129.231				108.491
		Max	81.9701				84.2697				97.532				95.0021				82.4236				78.6585				80				84.2035				121.905				180				170.909				206.329
[truncated: 41 more columns]
